# Supplementary material for: Phytochemical Characterization, Antioxidant, and Anti-Proliferative Activities of Wild and Cultivated Nigella damascena Species Collected in Sicily (Italy)
Source: MDPI journal article supplement (doi:10.3390/antiox13040402), 2024-03-27
Supplement: s1 [file s1]

## Supplementary Materials

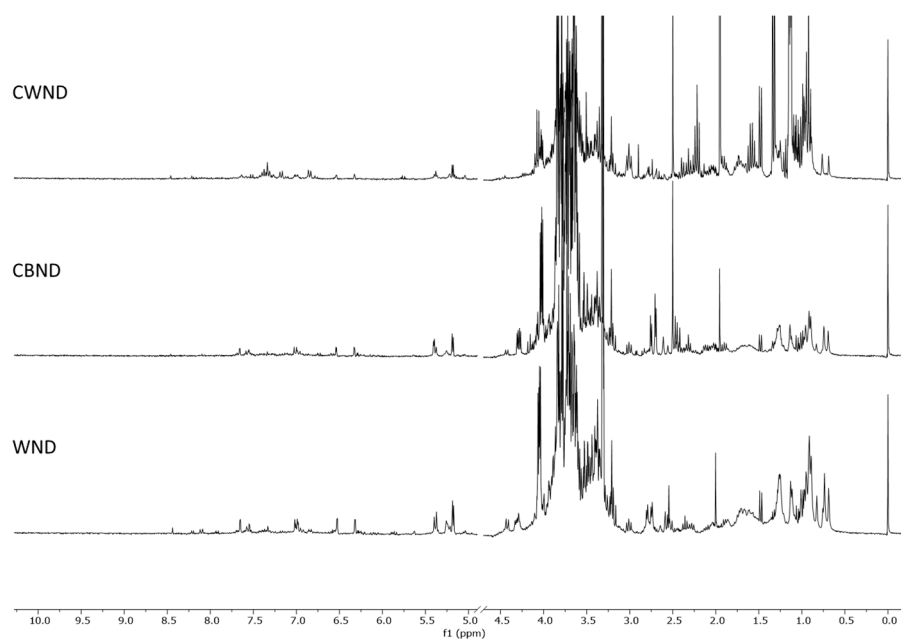

**Figure S1.**  $^1\text{H}$ -NMR spectra, acquired at 300 MHz in  $\text{CD}_3\text{OD}$ , of WND, CBND, and CWND *N. damascena* extracts.

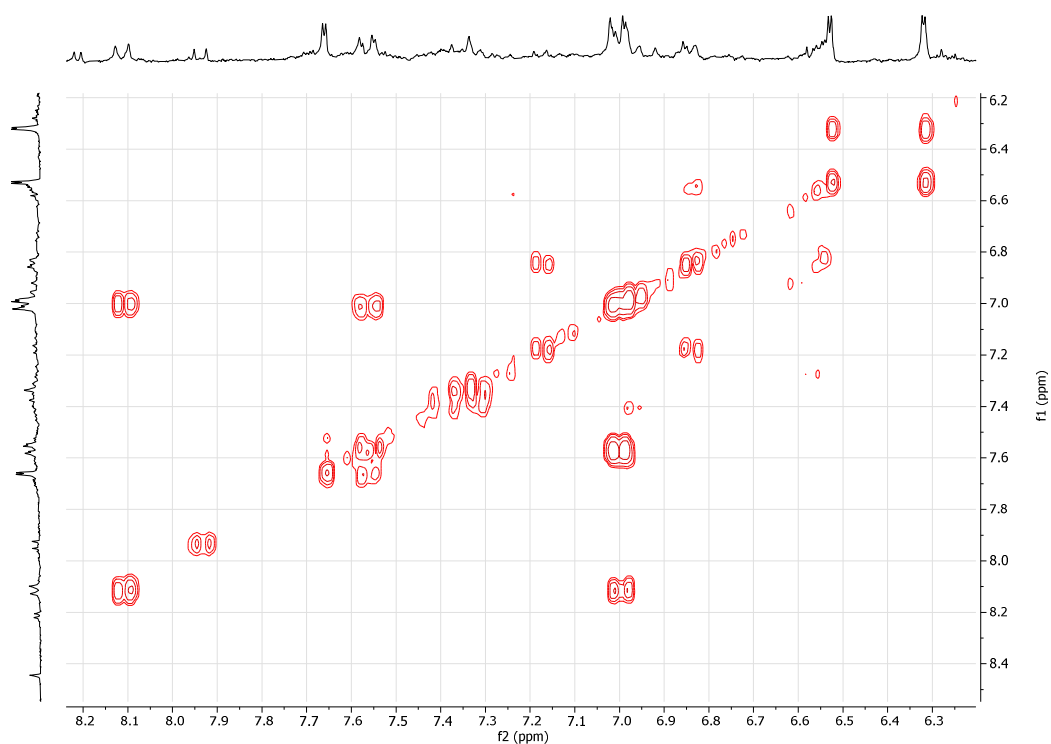

**Figure S2.** COSY spectrum of WND extract: aromatic region.

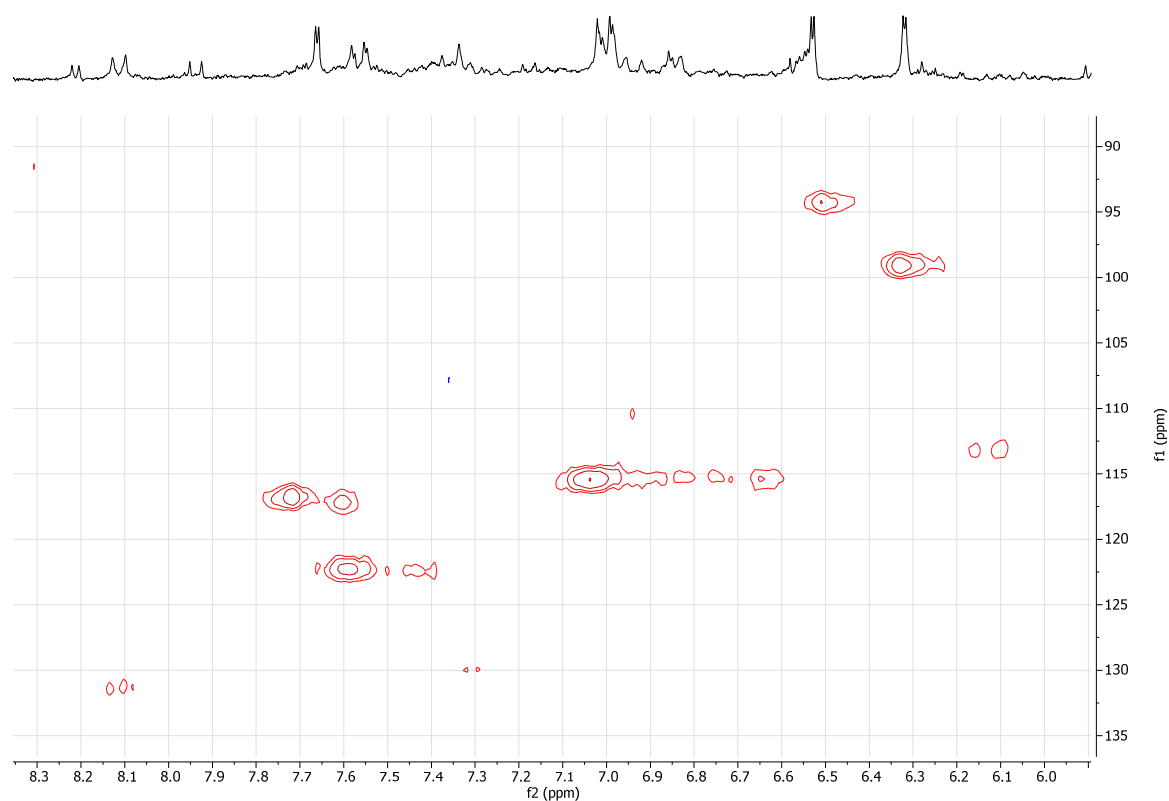

**Figure S3.** HSQC spectrum of **WND** extract: aromatic region.

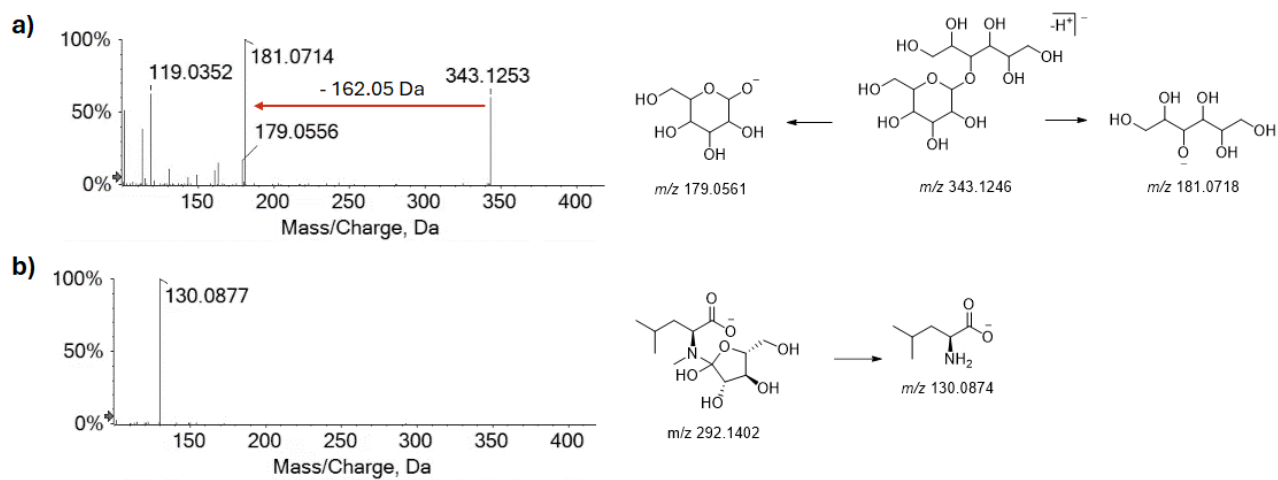

**Figure S4.** TOF-MS/MS spectra of hexosyl hexitol (a) and N-(deoxyfructosyl)leucine (b), tentatively identified in *N. damascena* extracts. Theoretical  $m/z$  values are reported below each structure.

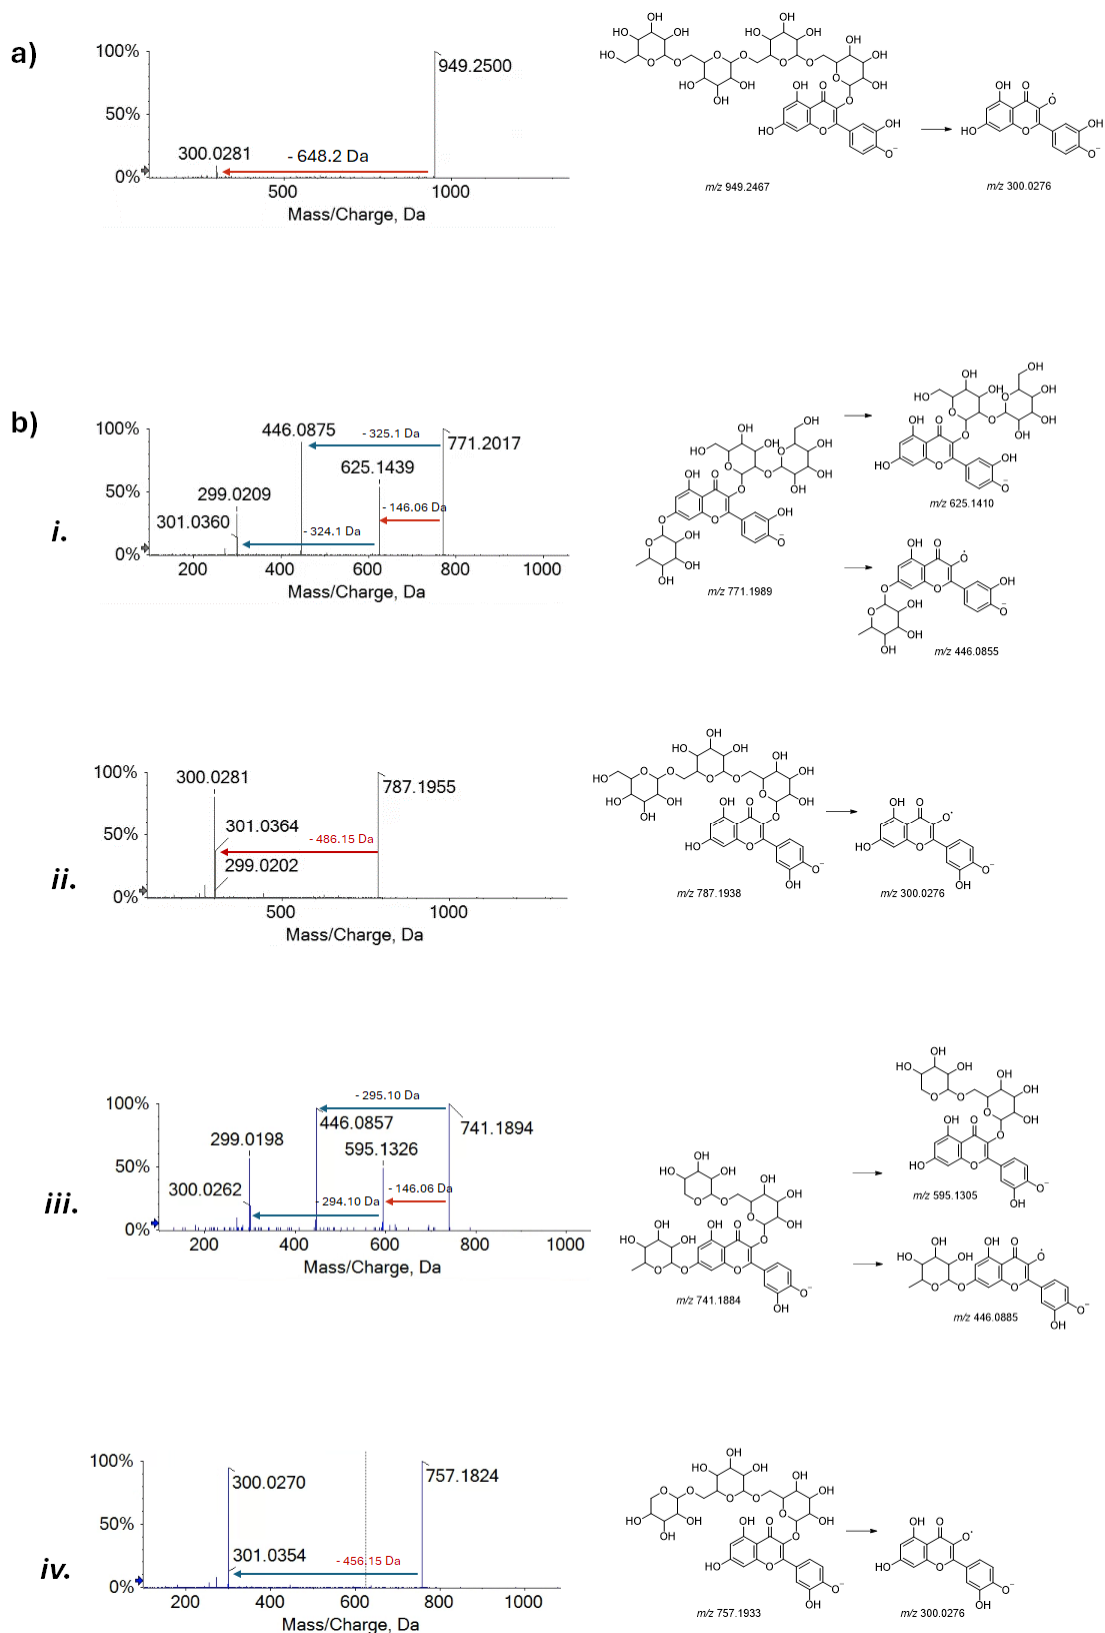

**Figure S5.** TOF-MS/MS spectra of (a) quercetin tetrahexoside (1), and (b) quercetin triglycosides (i). 2; (ii). 7; (iii). 8, and (iv). 16. Theoretical  $m/z$  values are reported below each structure.

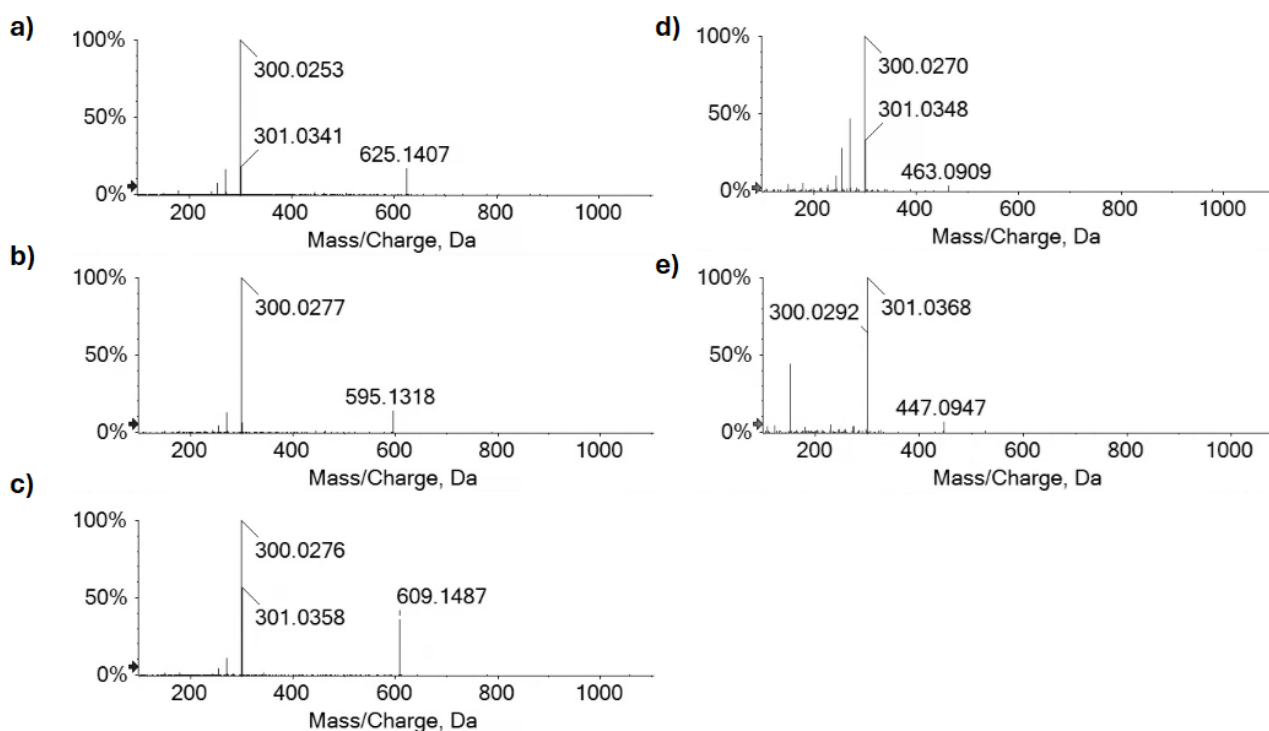

**Figure S6.** TOF-MS/MS spectra of quercetin diglycosides (a-c), and monoglycosides (d, e).

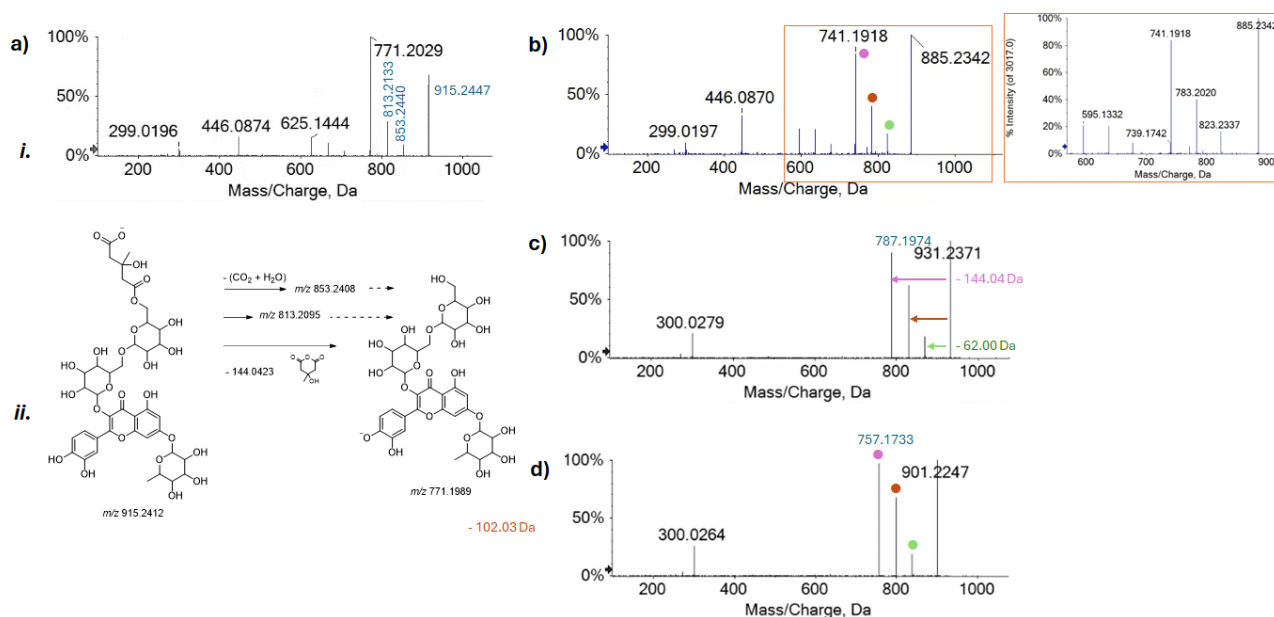

**Figure S7.** TOF-MS/MS spectra (i) of quercetin hydroxymethylglutaryl triglycosides 9 (a), 13 (b), 18 (c), and 24 (d). The fragmentation pattern hypothesized for compound 9 is depicted (ii); theoretical  $m/z$  values are below each structure.

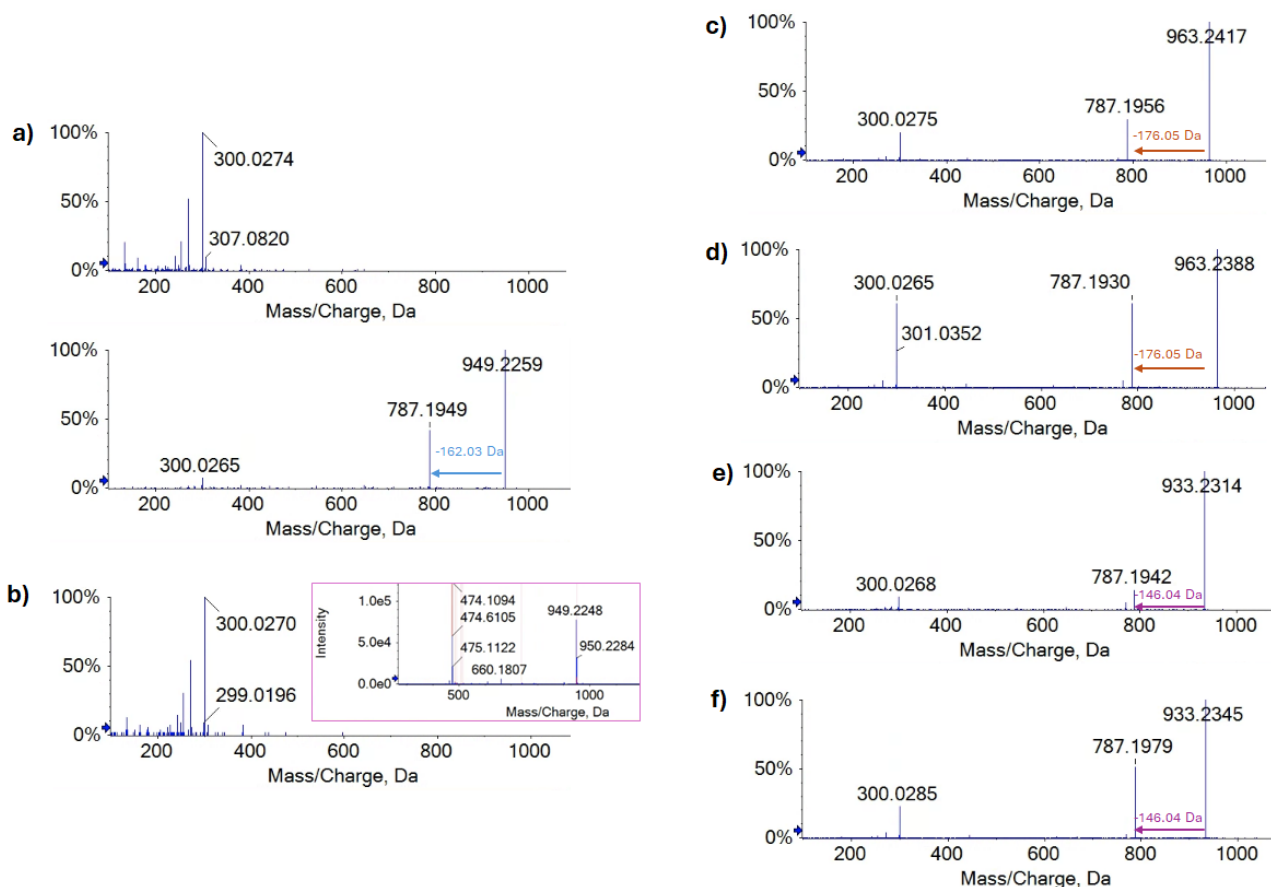

**Figure S8.** TOF-MS/MS spectra of quercetin hydroxycinnamoyl glycosides **19** (a), **22** (b), **25** (c), **28** (d), **26** (e), and **27** (f).

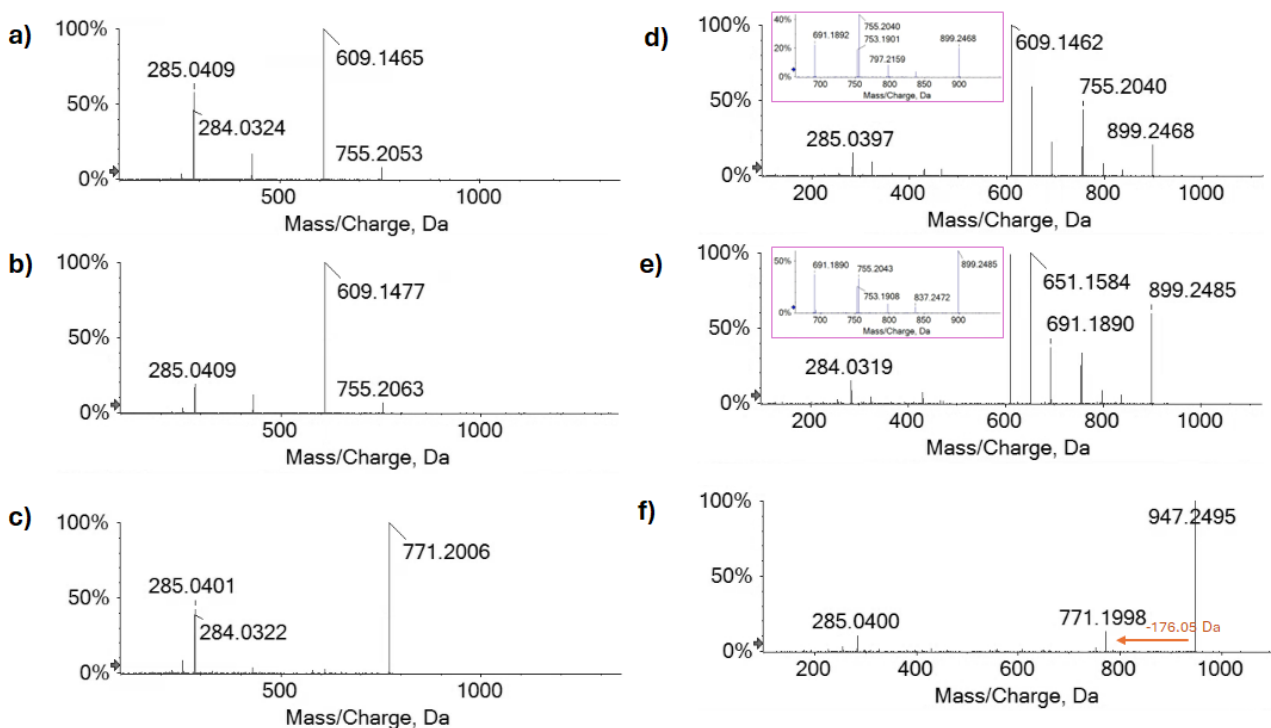

**Figure S9.** TOF-MS/MS spectra of kaempferol triglycosides **3** (a), **6** (b), **12** (c); the hydroxymethylglutaryl derivatives **11** (d), and **14** (e), and kaempferol feruloyl trihexoside **30** (f).

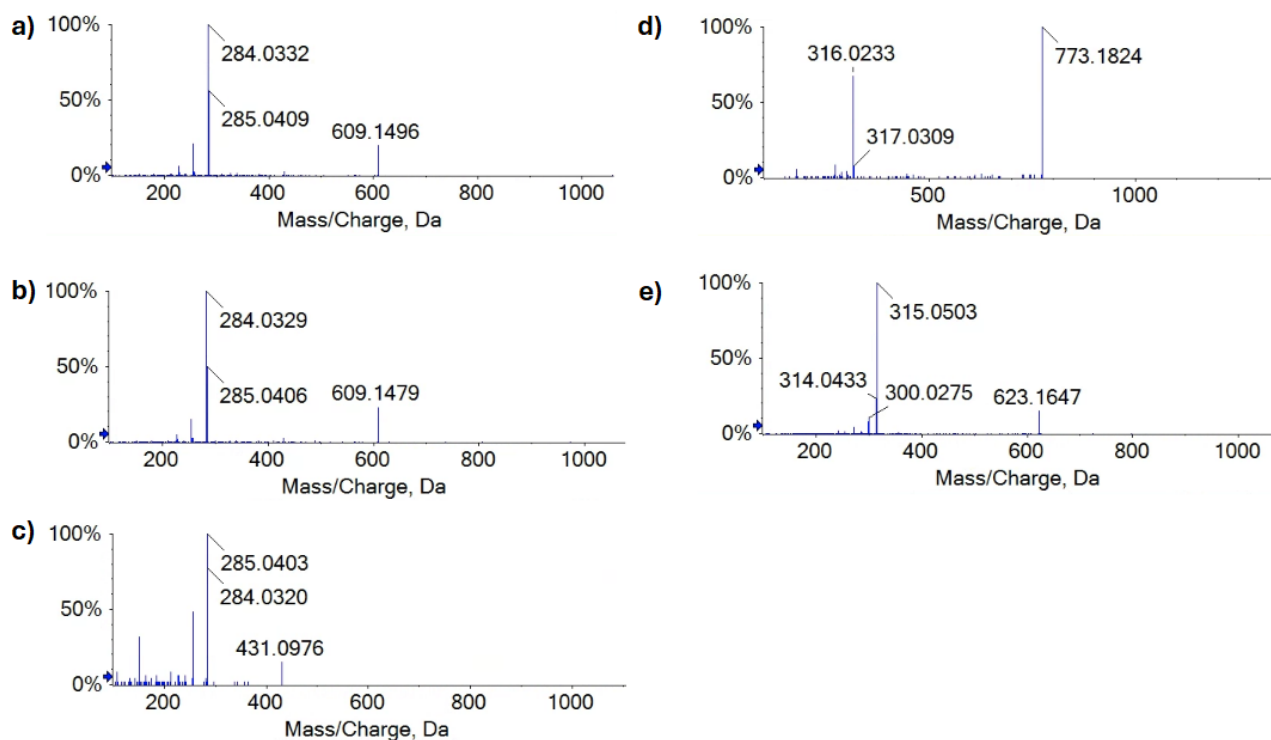

**Figure S10.** TOF-MS/MS spectra of kaempferol glycosides **4** (a), **17** (b), and **32** (c), and of myricetin triglycoside (**5**) (d) and isorhamnetin dihexoside (**29**) (e).

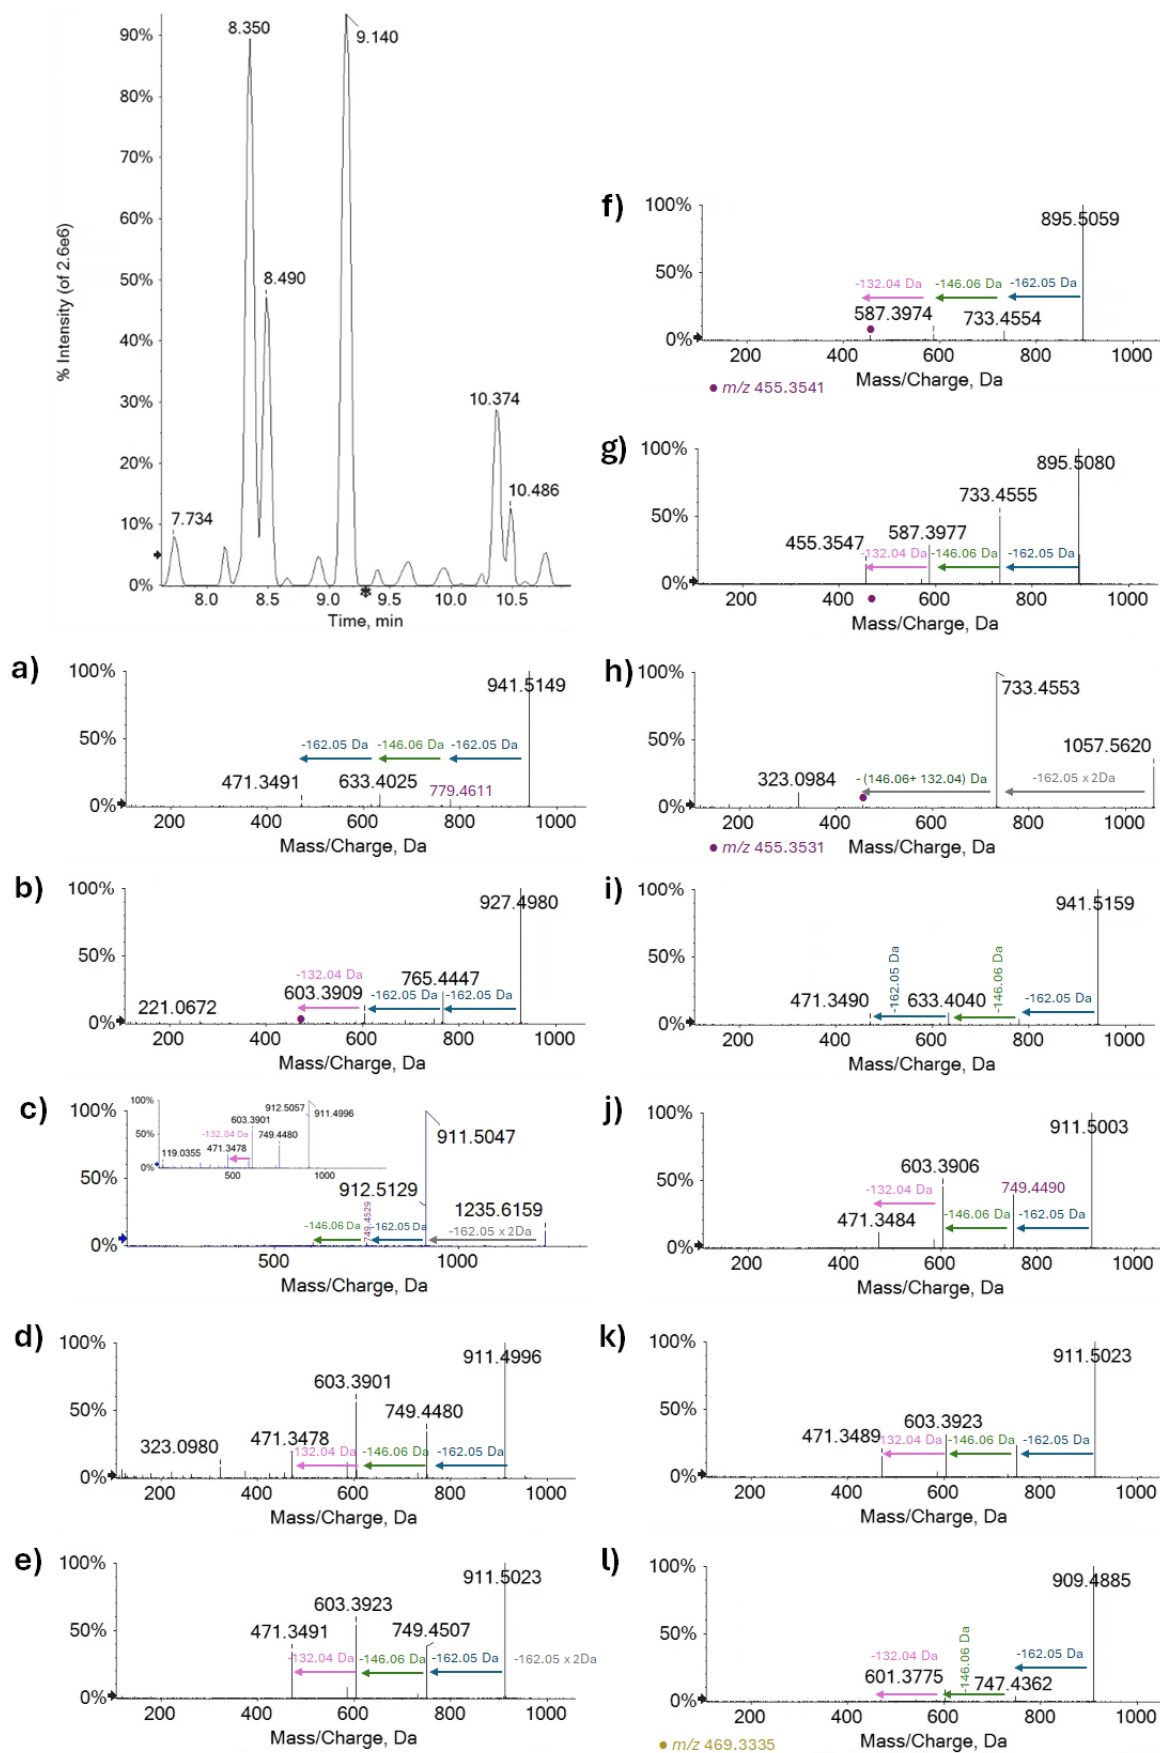

**Figure S11.** TOF-MS/MS spectra of triterpene saponins **1'** – **11'** (a-l). The TIC (Total Ion Chromatogram) region in which the compounds eluted, is shown in the upper part of the figure.

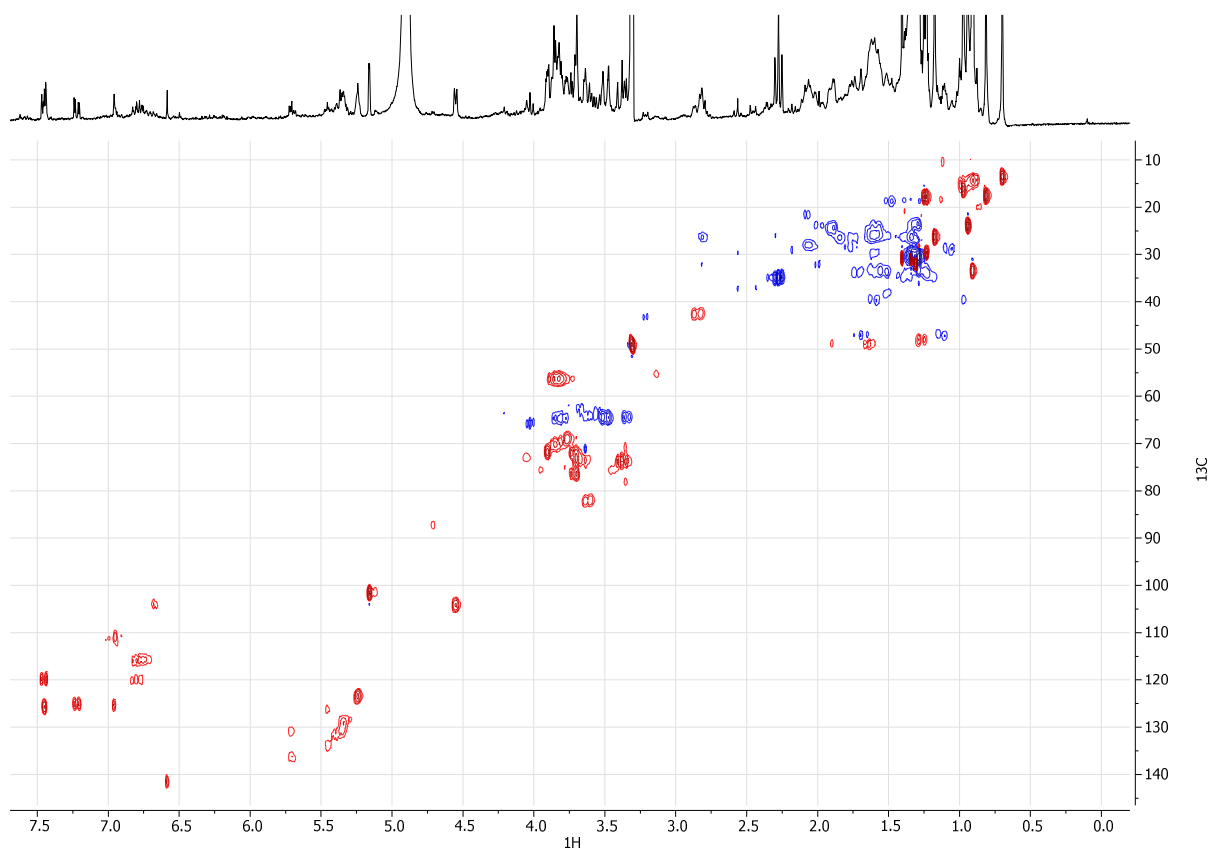

**Figure S12.** HSQC spectrum of the ethyl acetate fraction obtained from the L/L partitioning of the crude polar extract.

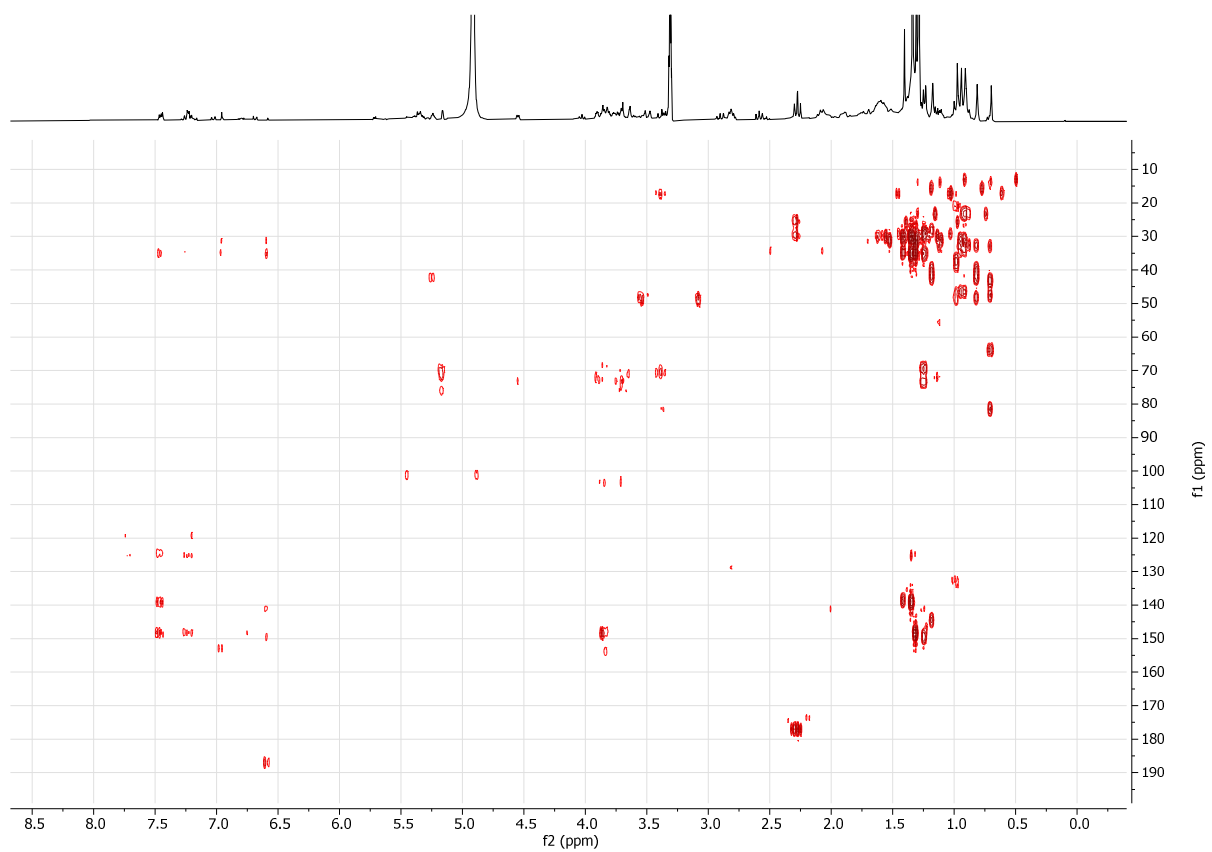

**Figure S13.** HMBC spectrum of the ethyl acetate fraction obtained from the L/L partitioning of the crude polar extract.
